# Supplementary material for: In situ synthesis of SnO2nanoparticles encapsulated in micro/mesoporous carbon foam as a high-performance anode material for lithium ion batteries
Source: Royal Society of Chemistry journal article supplement (doi:10.1039/c4ta04278f), 2014-09-10
Supplement: c4ta04278f1.pdf [file c4ta04278f1.pdf]

Electronic Supplementary Information

**In situ synthesis of SnO<sub>2</sub> nanoparticles encapsulated in  
micro/mesoporous carbon foam as high-performance anode material  
for Lithium ion batteries**

Xiulin Fan,<sup>ab</sup> Jie Shao,<sup>a</sup> Xuezhong Xiao,<sup>a</sup> Xinhua Wang,<sup>a</sup> Shouquan Li,<sup>a</sup> Hongwei Ge,<sup>a</sup>

Lixin Chen\*,<sup>a</sup> Chunsheng Wang\*<sup>b</sup>

*<sup>a</sup>State Key Laboratory of Silicon Materials, Key Laboratory of Advanced Materials  
and Application for Batteries of Zhejiang Province, Department of Materials Science  
and Engineering, Zhejiang University, Hangzhou 310027, PR China*

*<sup>b</sup>Department of Chemical and Biomolecular Engineering, University of Maryland,  
College Park, MD 20742, USA*

---

\* To whom correspondence should be addressed.

E-mail address: [lxchen@zju.edu.cn](mailto:lxchen@zju.edu.cn) (L.X. Chen)

\* To whom correspondence should be addressed.

E-mail address: [cswang@umd.edu](mailto:cswang@umd.edu) (C.S. Wang)

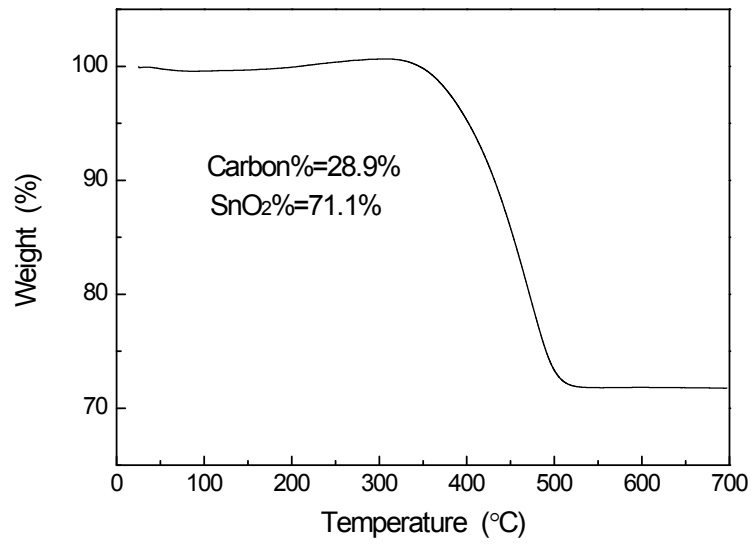

Figure S1. Thermogravimetric (TGA) profile of the SnO<sub>2</sub>@C porous composite in air, heating rate: 3 °C/min.

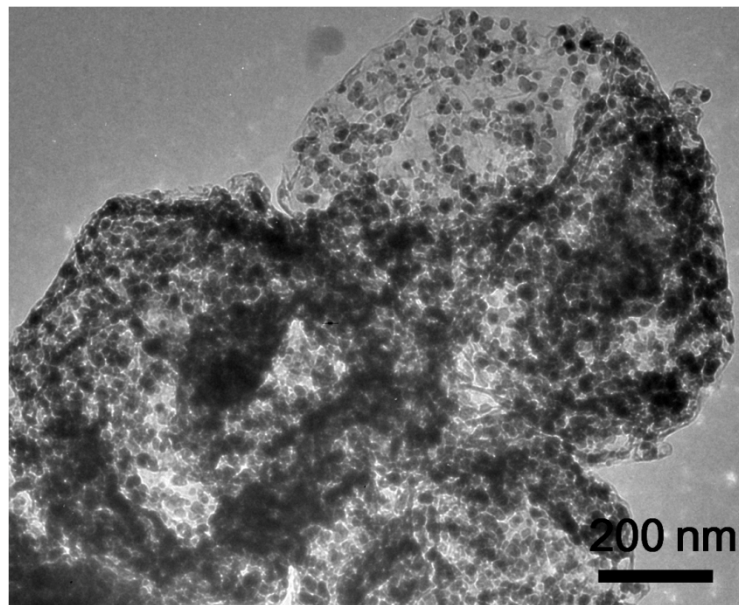

Figure S2. TEM image of the SnO<sub>2</sub>@C porous composite after ultrasonicated in ethanol for up to 6 h.

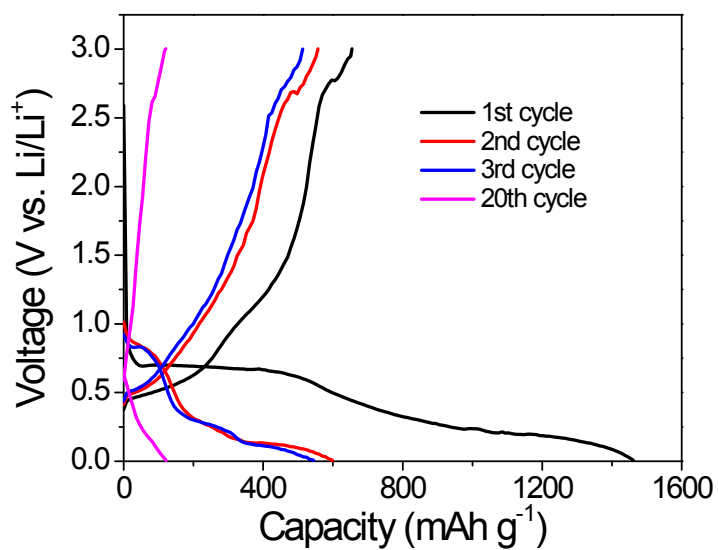

Figure S3. Galvanostatic charge-discharge profiles of the mixture of commercial SnO<sub>2</sub> nanoparticles and carbon black electrode at a constant current density of 500 mA g<sup>-1</sup>.
